# Supplementary material for: PKCδ Mediates NF-κB Inflammatory Response and Downregulates SIRT1 Expression in Liver Fibrosis
Source: PubMed Central journal article supplement (PMC6770793; doi:10.3390/ijms20184607), 2019-09-17
Supplement: ijms-20-04607-s001.pdf [file ijms-20-04607-s001.pdf]

## Supplementary Materials

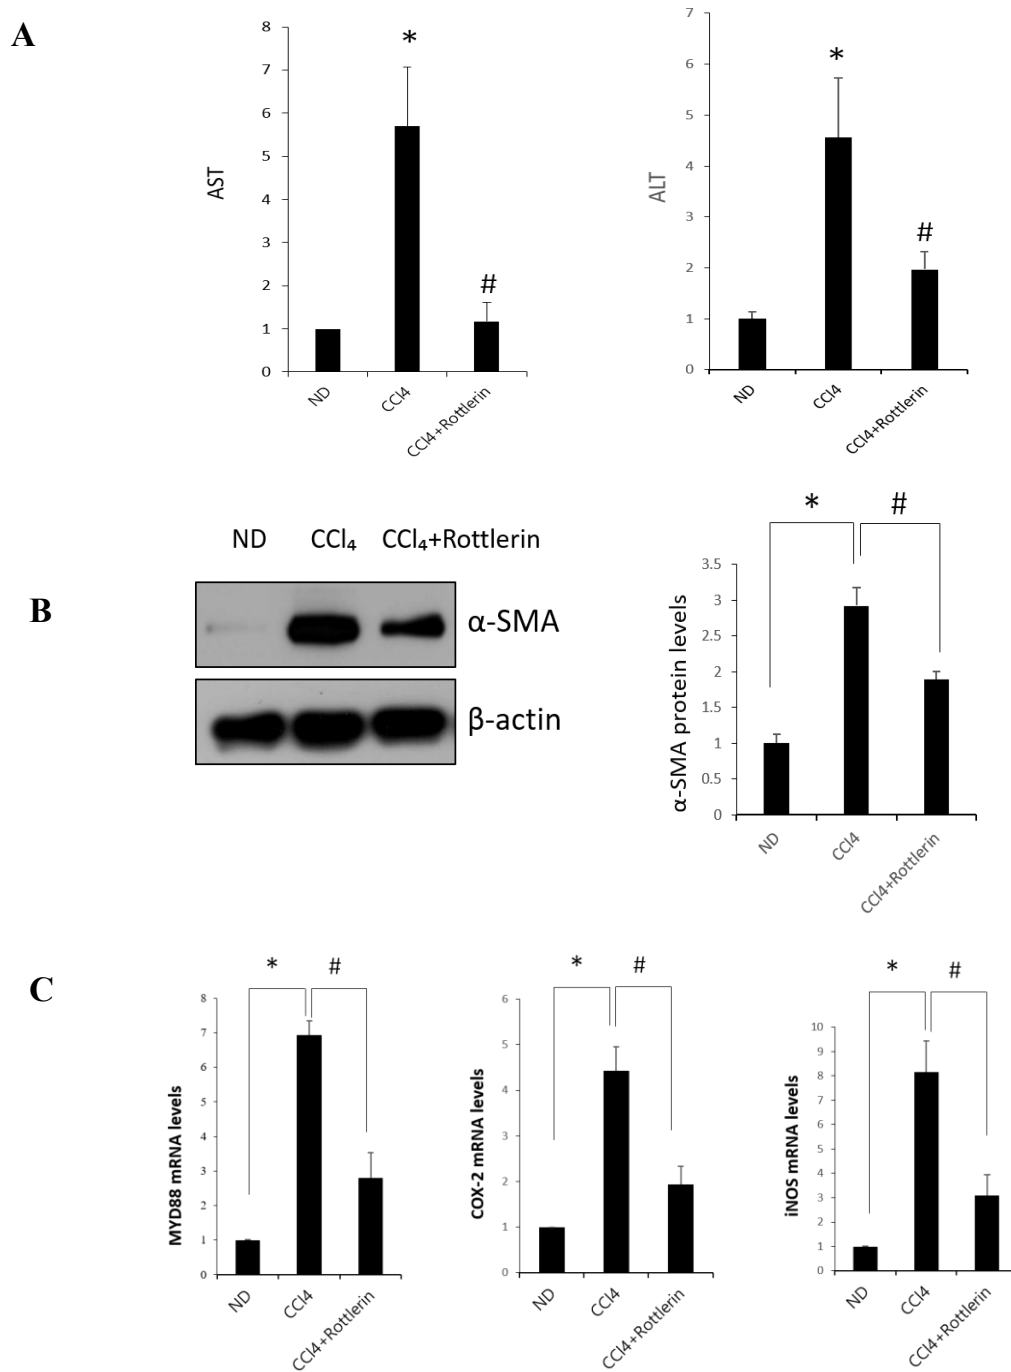

**Figure. S1. Effects of rottlerin on carbon tetrachloride (CCl<sub>4</sub>)-induced liver fibrosis in mice.** (A) Serum AST and ALT levels were measured in CCl<sub>4</sub> mice with and without rottlerin treatment. (B) The level of  $\alpha$ -SMA in CCl<sub>4</sub> mice after rottlerin treatment was analyzed by immunoblotting. (C) Hepatic mRNA levels of *myd88*, *COX-2*, and NF- $\kappa$ B-mediated the inflammatory cytokine *iNOS* were measured by qRT-PCR.

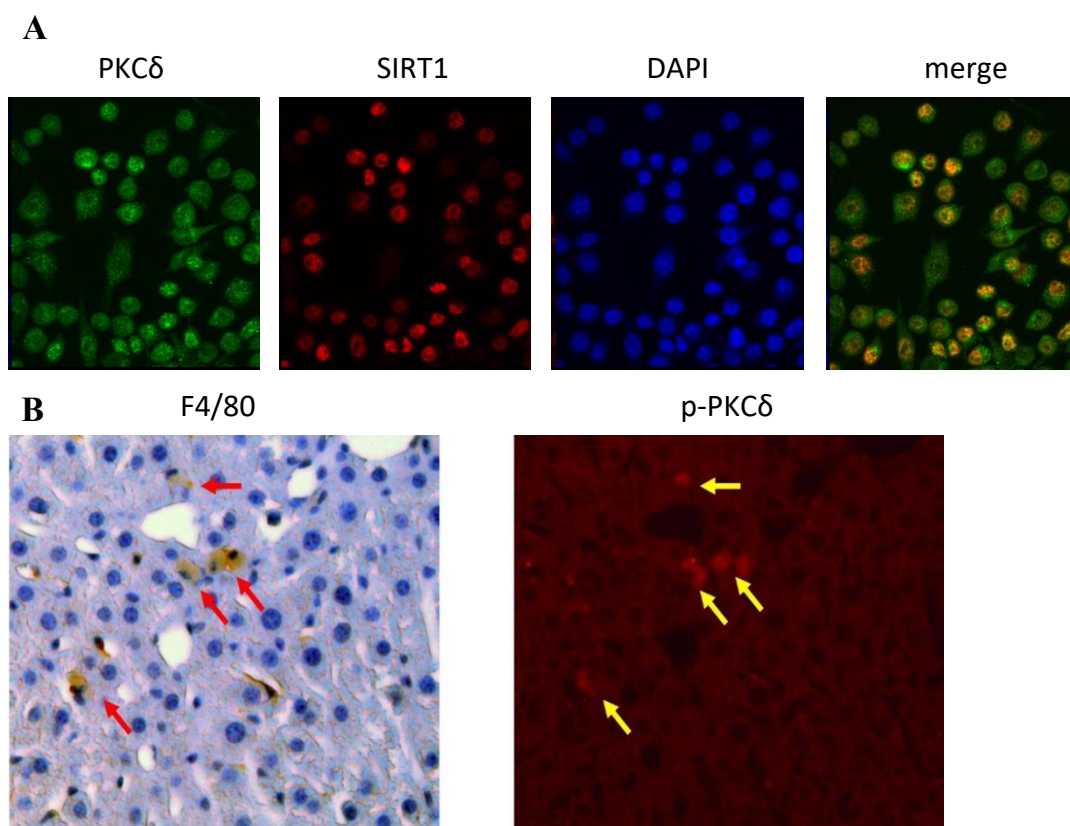

**Figure. S2. localization of PKC $\delta$ .** (A) Colocalization of PKC $\delta$  and SIRT1 in Raw 264.7 cells. Double Immunofluorescence staining for PKC $\delta$  (Green) and SIRT1 (Red) were assessed for colocalization by confocal microscopy (Original magnification, 200 $\times$ ). (B) Colocalization of F4/80 and p-PKC $\delta$  in hepatic macrophages in CCl<sub>4</sub> model. Double immunohistochemical staining for F4/80 (DAB indicated by red arrows) and p-PKC $\delta$  (red fluorescence indicated by yellow arrows) were assessed for colocalization by confocal microscopy (Original magnification, 200 $\times$ ).

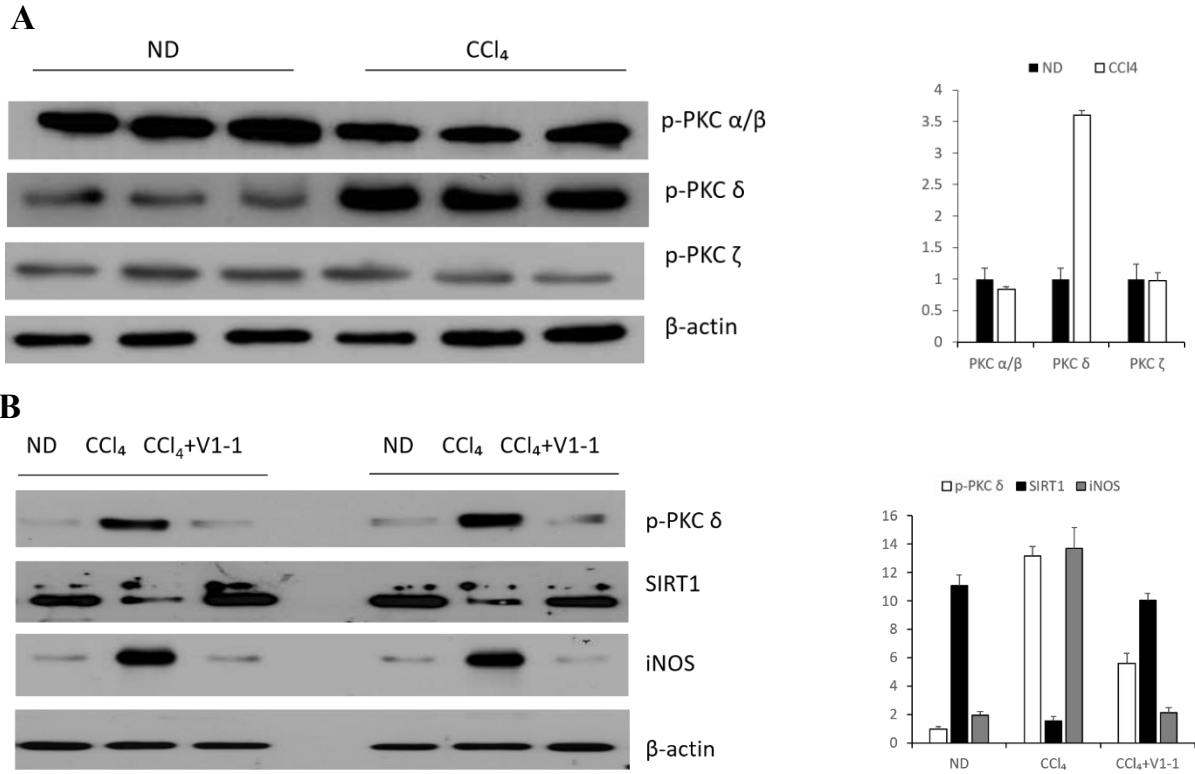

**Figure. S3. Western blot assays (representative blots).** (A) Fig 1A and (B) Fig 5C

**Table S1. Primers used for real-time PCR**

| Primer Name  | Sequences                                  |
|--------------|--------------------------------------------|
| <i>18S</i>   | (F)5'-GTA ACC CGT TGA ACC CCA TT-3'        |
|              | (R)5'-CCA TCC AAT CGG TAG TAG CG-3'        |
| <i>GAPDH</i> | (F)5'-TGG TAT CGT GGA AGG ACT CA           |
|              | (R)5'-AGT GGG TGT CGC TGT TGA AG           |
| <i>TNFα</i>  | (F)5'-CAC CAC CAT CAA GGA CTC AA-3'        |
|              | (R)5'-AGG CAA CCT GAC CAC TCT CC-3'        |
| <i>Myd88</i> | (F)5'-AGA ACA GAC AGA CTA TCG GCT-3'       |
|              | (R)5'-CGG CGA CAC CTT TTC TCA AT-3'        |
| <i>COX-2</i> | (F)5'-ATT CCT GGC GTT ACC TTG-3'           |
|              | (R)5'-CTG TAT TCC GTC TCC TTG GTT-3'       |
| <i>IL-1β</i> | (F) 5'-GCAACTGTTCTGAAGTCAACT-3'            |
|              | (R) 5'-ATCTTTTGGGGTCCGTCAACT-3'            |
| <i>IL-6</i>  | (F)5'-GAC AAC TTT GGC ATT GTG G-3'         |
|              | (R)5'-ATG CAG GGA TGA TGT TCT G-3'         |
| <i>TLR4</i>  | (F)5'-ACC TCT GCC TTC ACT ACA GA-3'        |
|              | (R)5'-AGG GAC TTC TCA ACC TTC TC-3'        |
| <i>iNOS</i>  | (F)5'-CTG CAG CAC TTG GAT CAG GAA CCT G-3' |
|              | (R)5'-GGG AGT AGC CTG TGT GCA CCT GGA A-3' |

|                 |                                        |
|-----------------|----------------------------------------|
| <i>collagen</i> | (F) 5'- GAC ATC CCT GAA GTC AGC TGC-3' |
|                 | (R) 5'-TCC CTT GGG TCC CTC GAC-3'      |
| <i>SIRT1</i>    | (F) 5'-TTG TGA AGC TGT TCG TGG AG-3'   |
|                 | (R) 5'-GGC GTG GAG GTT TTT CAG TA-3'   |
